# Supplementary material for: Serum Fatty Acid Profiles Are Associated with Disease Activity in Early Rheumatoid Arthritis: Results from the ESPOIR Cohort
Source: MDPI journal article supplement (doi:10.3390/nu14142947), 2022-07-19
Supplement: s1 [file s1]

## Supplementary material

**Supplementary Table S1.** Univariate analysis of the association between pattern 06 and patient characteristics at inclusion in the cohort.

| Pattern 06             |                                 | T1          | T2          | T3          | p                |
|------------------------|---------------------------------|-------------|-------------|-------------|------------------|
| Age, mean (SD)         | --                              | 47.0 (13.1) | 47.4 (12.5) | 51.3 (10.6) | <b>&lt;0.001</b> |
| Smoking                | Never smoker                    | 132 (59.2)  | 123 (55.2)  | 100 (44.8)  | <b>0.04</b>      |
|                        | Former smoker                   | 51 (22.9)   | 56 (25.1)   | 65 (29.2)   |                  |
|                        | Current smoker                  | 40 (17.9)   | 44 (19.7)   | 58 (26.0)   |                  |
| BMI                    | Underweight or normal           | 149 (66.8)  | 128 (57.9)  | 114 (51.1)  | <b>0.002</b>     |
|                        | Overweight                      | 57 (25.6)   | 59 (26.7)   | 64 (28.7)   |                  |
|                        | Obesity                         | 17 (7.6)    | 34 (15.4)   | 45 (20.2)   |                  |
| Ethnicity              | Other                           | 21 (9.4)    | 16 (7.2)    | 17 (7.6)    | 0.66             |
|                        | Caucasian                       | 202 (90.6)  | 207 (92.8)  | 206 (92.4)  |                  |
| Sex                    | Men                             | 44 (19.7)   | 45 (20.2)   | 63 (28.3)   | 0.05             |
|                        | Women                           | 179 (80.3)  | 178 (79.8)  | 160 (71.8)  |                  |
| Professional status    | Working or student              | 140 (63.1)  | 140 (62.8)  | 127 (57.0)  | 0.68             |
|                        | Unemployed (whatever the cause) | 40 (18.0)   | 39 (17.5)   | 46 (20.6)   |                  |
|                        | Retired                         | 42 (18.9)   | 44 (19.7)   | 50 (22.4)   |                  |
| Education level        | Primary school                  | 81 (36.3)   | 102 (45.7)  | 123 (55.2)  | <b>&lt;0.001</b> |
|                        | High school                     | 51 (22.9)   | 48 (21.5)   | 53 (23.8)   |                  |
|                        | Graduate education              | 91 (40.8)   | 73 (32.7)   | 47 (21.1)   |                  |
| Marital status         | Single                          | 69 (31.1)   | 57 (25.6)   | 56 (25.1)   | 0.29             |
|                        | Married                         | 153 (68.9)  | 166 (74.4)  | 167 (74.9)  |                  |
| ACPA                   | Positive                        | 101 (45.7)  | 90 (40.7)   | 120 (54.8)  | <b>0.01</b>      |
| IgM-RF                 | Positive                        | 132 (59.2)  | 115 (51.6)  | 138 (61.9)  | 0.07             |
| Typical RA erosions    | Yes                             | 30 (13.5)   | 25 (11.2)   | 45 (20.2)   | <b>0.02</b>      |
|                        | corticosteroids                 | 44 (19.7)   | 41 (18.4)   | 36 (16.1)   |                  |
| NSAIDs                 | Yes                             | 206 (92.4)  | 197 (88.3)  | 202 (90.6)  | 0.35             |
| Beta-blockers          | Yes                             | 11 (4.9)    | 15 (6.7)    | 25 (11.3)   | <b>0.03</b>      |
| Statins                | Yes                             | 7 (3.1)     | 22 (9.9)    | 15 (3.8)    | <b>0.02</b>      |
| HRT or OC              | Yes                             | 55 (24.7)   | 29 (13.0)   | 28 (12.6)   | <b>&lt;0.001</b> |
| Baseline use of DMARDs | Yes                             | 19 (8.5)    | 18 (9.1)    | 15 (6.7)    | 0.76             |
| Baseline DAS28         | > 5.1 (high)                    | 114 (53.0)  | 94 (42.7)   | 132 (59.7)  | <b>0.002</b>     |
| CRP, mean (SD)         | --                              | 18.6 (28.1) | 17.2 (27.5) | 26.5 (43.0) | <b>0.007</b>     |

Data are n (%) unless indicated. Bold p values are significant (P<0.05). BMI: body mass index; CRP: C-reactive protein; DAS28: disease activity score in 28 joints based on ESR; HRT: hormonal replacement therapy; OC: oral contraception; RA: rheumatoid arthritis; ACPA: anti-citrullinated peptide antibodies; RF: rheumatoid factor (IgM); c/bDMARD: conventional/biological disease-modifying anti-rheumatic drugs; NSAIDs: non-steroidal anti-inflammatory drugs; T1, T2, T3: tertile 1, 2 and 3 of pattern score, respectively.

**Supplementary Table S2.** Univariate analysis of the association between pattern  $\omega$ 7-9 and patient characteristics at inclusion in the cohort

| Pattern $\omega$ 7-9   |                                 | T1          | T2          | T3          | p              |
|------------------------|---------------------------------|-------------|-------------|-------------|----------------|
| Age, mean (SD)         | --                              | 46.4 (12.5) | 48.7 (12.0) | 50.6 (12.0) | <b>0.002</b>   |
| Smoking                | Never smoker                    | 125 (56.3)  | 131 (58.5)  | 99 (44.4)   | <b>0.03</b>    |
|                        | Former smoker                   | 55 (24.8)   | 51 (22.8)   | 66 (29.6)   |                |
|                        | Current smoker                  | 42 (18.9)   | 42 (18.8)   | 58 (26.0)   |                |
| BMI                    | Underweight or normal           | 150 (67.9)  | 132 (58.9)  | 109 (49.1)  | < <b>0.001</b> |
|                        | Overweight                      | 56 (25.3)   | 50 (22.3)   | 74 (33.3)   |                |
|                        | Obesity                         | 15 (6.8)    | 42 (18.8)   | 39 (17.6)   |                |
| Ethnicity              | Other                           | 28 (12.6)   | 20 (8.9)    | 6 (2.7)     | < <b>0.001</b> |
|                        | Caucasian                       | 194 (87.4)  | 204 (91.1)  | 217 (97.3)  |                |
| Sex                    | Men                             | 41 (18.5)   | 50 (22.3)   | 61 (27.4)   | 0.08           |
|                        | Women                           | 181 (81.5)  | 174 (77.7)  | 162 (72.7)  |                |
| Professional status    | Working or student              | 133 (59.9)  | 150 (67.0)  | 124 (55.9)  | <b>0.046</b>   |
|                        | Unemployed (whatever the cause) | 50 (22.5)   | 32 (14.3)   | 43 (19.4)   |                |
|                        | Retired                         | 39 (17.6)   | 42 (18.8)   | 55 (24.8)   |                |
| Education level        | Primary school                  | 101 (45.5)  | 100 (44.6)  | 105 (47.1)  | 0.83           |
|                        | Highschool                      | 53 (23.9)   | 47 (21.0)   | 52 (23.3)   |                |
|                        | Graduate education              | 68 (30.6)   | 77 (34.4)   | 66 (29.6)   |                |
| Marital status         | Single                          | 62 (27.9)   | 61 (27.2)   | 59 (26.6)   | 0.95           |
|                        | Married                         | 160 (72.1)  | 163 (72.8)  | 163 (73.4)  |                |
| ACPA                   | Positive                        | 115 (52.3)  | 97 (43.9)   | 99 (45.0)   | 0.16           |
| IgM-RF                 | Positive                        | 133 (59.9)  | 125 (55.8)  | 127 (57.0)  | 0.66           |
| Typical RA erosions    | Yes                             | 34 (15.3)   | 31 (13.8)   | 35 (15.8)   | 0.84           |
| Corticosteroids        | Yes                             | 35 (15.8)   | 46 (20.5)   | 40 (17.9)   | 0.42           |
| NSAIDs                 | Yes                             | 194 (87.4)  | 203 (90.6)  | 208 (93.3)  | 0.11           |
| Beta-blockers          | Yes                             | 9 (4.1)     | 20 (8.9)    | 22 (9.9)    | <b>0.048</b>   |
| Statins                | Yes                             | 8 (3.6)     | 14 (2.3)    | 22 (9.9)    | <b>0.03</b>    |
| HRT or OC              | Yes                             | 27 (12.2)   | 36 (16.1)   | 49 (22.0)   | <b>0.02</b>    |
| Baseline use of DMARDs | Yes                             | 15 (6.8)    | 17 (7.6)    | 20 (9.0)    | 0.68           |
| Baseline DAS28         | > 5.1 (high)                    | 102 (47.0)  | 114 (51.1)  | 124 (57.4)  | 0.09           |
| CRP, mean (SD)         | --                              | 18.0 (29.9) | 20.0 (36.8) | 24.2 (34.3) | 0.15           |

Data are n (%) unless otherwise indicated. Bold p values are significant ( $P < 0.05$ ).

BMI: body mass index; CRP: C-reactive protein; DAS28: disease activity score in 28 joints based on ESR; HRT: hormonal replacement therapy; OC: oral contraception; RA: rheumatoid arthritis; ACPA: anti-citrullinated peptide antibodies; RF: rheumatoid factor (IgM); c/bDMARD: conventional/biological disease-modifying anti-rheumatic drugs; NSAIDs: non-steroidal anti-inflammatory drugs; T1, T2, T3: tertile 1, 2 and 3 of pattern score, respectively.

**Supplementary Table S3.** Univariate analysis of the association between baseline FA patterns and 6-month high disease activity (DAS28 >5.1) (n=594)

|                       | T1        | T2               | T3               | p    | p trend |
|-----------------------|-----------|------------------|------------------|------|---------|
| <b>Pattern ω7-9</b>   |           |                  |                  |      |         |
| N (%) with DAS28 >5.1 | 31 (15.2) | 28 (13.3)        | 25 (12.3)        |      |         |
| OR (95% CI)           | Ref       | 0.81 (0.46-1.42) | 0.61 (0.33-1.11) | 0.69 | 0.4     |
| <b>Pattern ω3</b>     |           |                  |                  |      |         |
| N (%) with DAS28 >5.1 | 38 (18.1) | 26 (12.8)        | 20 (9.9)         |      |         |
| OR (95% CI)           | Ref       | 0.66 (0.38-1.14) | 0.49 (0.27-0.88) | 0.05 | 0.01    |
| <b>Pattern ω6</b>     |           |                  |                  |      |         |
| N (%) with DAS28 >5.1 | 39 (18.9) | 19 (9.2)         | 26 (12.7)        |      |         |
| OR (95% CI)           | Ref       | 0.43 (0.24-0.78) | 0.62 (0.36-1.06) | 0.01 | 0.06    |

DAS28: Disease Activity Score in 28 joints; OR: odds ratio; 95% CI: 95% confidence interval

**Supplementary Table S4.** Multivariate analysis of the association between FA patterns and 6-month moderate-to-high disease activity (DAS28 ≥ 3.2) (n= 594)

|                     |         | T1  | T2               | T3               | p trend |
|---------------------|---------|-----|------------------|------------------|---------|
| <b>Pattern ω7-9</b> |         |     |                  |                  |         |
| OR (95% CI)         | Model 1 | Ref | 0.78 (0.51-1.20) | 1.03 (0.66-1.59) | 0.90    |
|                     | Model 2 | Ref | 0.78 (0.51-0.20) | 1.01 (0.65-1.56) | 0.97    |
| <b>Pattern ω3</b>   |         |     |                  |                  |         |
| OR (95% CI)         | Model 1 | Ref | 0.93 (0.60-1.44) | 0.72 (0.45-1.14) | 0.15    |
|                     | Model 2 | Ref | 0.95 (0.61-1.48) | 0.74 (0.47-0.17) | 0.19    |
| <b>Pattern ω6</b>   |         |     |                  |                  |         |
| OR (95% CI)         | Model 1 | Ref | 0.98 (0.64-1.50) | 0.95 (0.61-1.47) | 0.80    |
|                     | Model 2 | Ref | 0.97 (0.64-1.49) | 0.92 (0.59-1.42) | 0.71    |

Model 1: adjusted for age, sex, BMI, smoking status, education level, work, baseline ACPA status, baseline RF status, baseline DAS28, baseline CRP level, baseline treatments (NSAIDs, corticosteroids, statins, HRT or OC, beta blockers, DMARDs treatment between 0 and 6 months. Model 2: model 1 not adjusted for baseline CRP level

BMI: body mass index; CRP: C-reactive protein; HRT: hormone replacement therapy; OC: oral contraception; ACPA: anti-citrullinated peptide antibodies; RF: rheumatoid factor (IgM); NSAIDs: nonsteroidal anti-inflammatory drugs; OR: odds ratio; 95% CI: 95% confidence interval

**Supplementary Table S5.** Multivariate analysis of the association between FA patterns and 6-month non-remission (DAS28  $\geq$  2.6) (n=594)

|                                       |         | T1  | T2               | T3               | p trend |
|---------------------------------------|---------|-----|------------------|------------------|---------|
| <b>Pattern <math>\omega</math>7-9</b> |         |     |                  |                  |         |
| OR (95% CI)                           | Model 1 | Ref | 0.74 (0.47-1.17) | 1.02 (0.63-1.64) | 0.98    |
|                                       | Model 2 | Ref | 0.74 (0.47-1.17) | 1.00 (0.62-1.62) | 0.98    |
| <b>Pattern <math>\omega</math>3</b>   |         |     |                  |                  |         |
| OR (95% CI)                           | Model 1 | Ref | 0.99 (0.61-1.60) | 0.63 (0.38-1.04) | 0.07    |
|                                       | Model 2 | Ref | 1.00 (0.62-1.63) | 0.65 (0.39-1.06) | 0.08    |
| <b>Pattern <math>\omega</math>6</b>   |         |     |                  |                  |         |
| OR (95% CI)                           | Model 1 | Ref | 1.06 (1.68-1.67) | 0.95 (0.59-1.53) | 0.85    |
|                                       | Model 2 | Ref | 1.06 (0.67-1.66) | 0.92 (0.58-1.48) | 0.76    |

Model 1: adjusted for age, sex, BMI, smoking status, education level, work, baseline ACPA status, baseline RF, baseline DAS28, baseline CRP level, baseline treatments (NSAIDs, corticosteroids, statins, HRT or OC, beta blockers, DMARDs treatment between 0 and 6 months. Model 2: model 1 not adjusted for baseline CRP level

BMI: body mass index; CRP: C-reactive protein; HRT: hormone replacement therapy; OC: oral contraception; ACPA: anti-citrullinated peptide antibodies; RF: rheumatoid factor (IgM); NSAIDs: nonsteroidal anti-inflammatory drugs; OR: odds ratio; 95% CI: 95% confidence interval
